# Supplementary material for: Electrochemical investigations into Tau protein phosphorylations
Source: Royal Society of Chemistry journal article supplement (doi:10.1039/c2an35097a), 2012-01-01
Supplement: c2an35097a.pdf [file c2an35097a.pdf]

## **Electrochemical investigations into Tau protein phosphorylations**

Sanela Martić, Samaneh Beheshti, Meghan K. Rains and Heinz-Bernhard Kraatz\*

*Department of Physical and Environmental Sciences, University of Toronto at Scarborough, Toronto, Ontario, M1C 1A4, Canada*

### **Supporting Information**

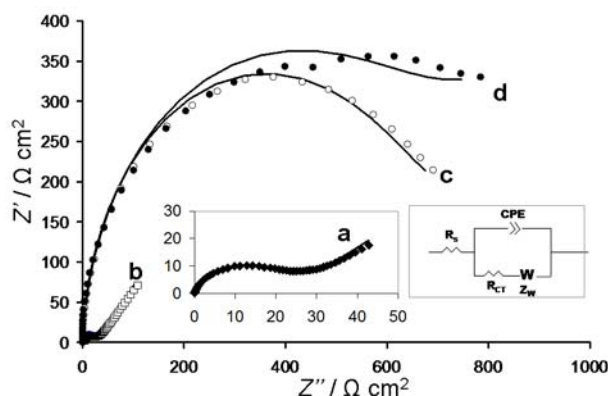

**Fig. S1.** Faradaic impedance spectra of a) bare gold electrode, b) Lip-NHS, c) Tau-modified gold electrode and d) ethanolamine blocking. The inset I shows bare gold electrode and the inset II depicts the equivalent circuit applied to fit all the data. The experimental data are represented by symbols, the fitting is a solid line,  $R_s$ , solution resistance, CPE constant phase element,  $R_{CT}$  charge transfer resistance, and  $Z_W$  is the finite length Warburg impedance. Measurements were done in 5 mM  $K_4[Fe(CN)_6] \cdot 3H_2O$  and  $K_3[Fe(CN)_6] \cdot 3H_2O$  in 0.1 M sodium phosphate buffer (pH 7.4).

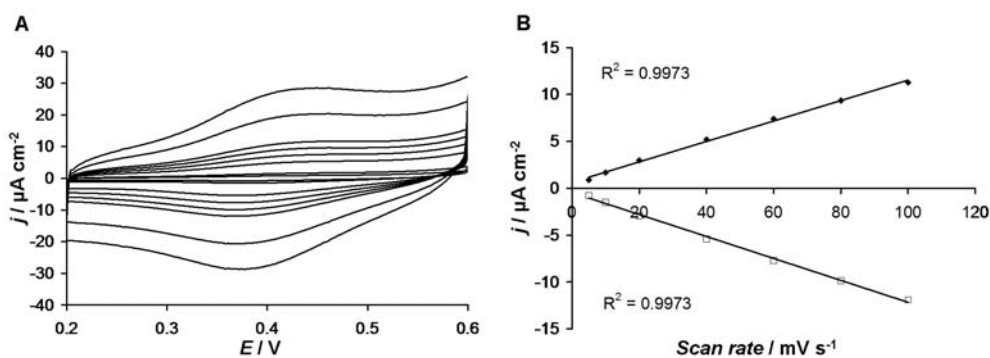

**Fig. S2.** A) Cyclic voltammograms as a function of scan rate for Fc-phosphorylated Tau-modified gold electrode. B) Plot of anodic and cathodic current densities as a function of scan rate (GSK-3 $\beta$  catalyzed Fc-phosphorylation, Ag/AgCl as reference electrode, Pt wire as auxiliary electrode, 0.1 M sodium phosphate buffer pH 7.4).

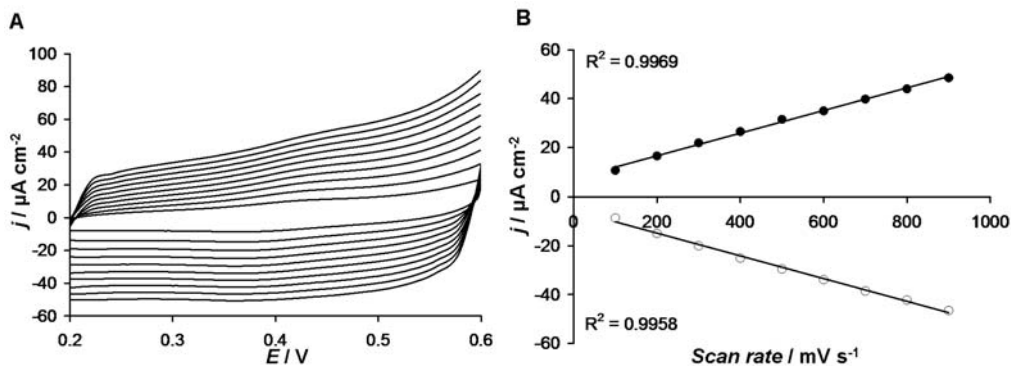

**Fig. S3.** A) Cyclic voltammograms as a function of scan rate for Fc-phosphorylated Tau-modified gold electrode. B) Plot of anodic and cathodic current densities as a function of scan rate (Src catalyzed Fc-phosphorylation, Ag/AgCl as reference electrode, Pt wire as auxiliary electrode, 0.1 M sodium phosphate buffer pH 7.4).

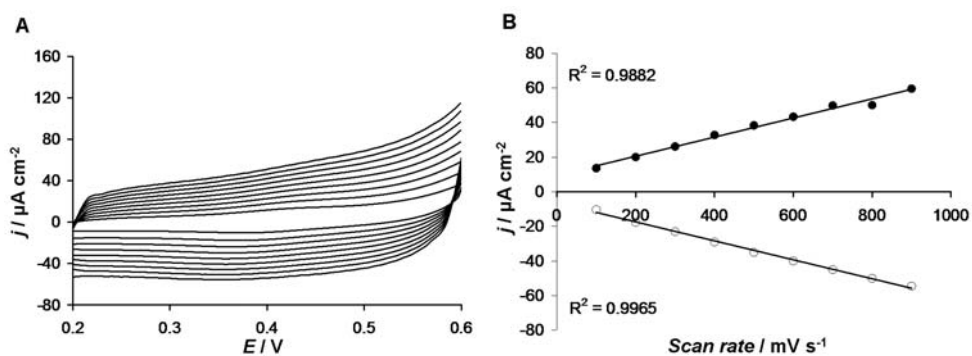

**Fig. S4.** (a) Cyclic voltammograms as a function of scan rate for Fc-phosphorylated Tau-modified gold electrode. (b) Plot of anodic and cathodic current densities as a function of scan rate (PKA catalyzed Fc-phosphorylation, Ag/AgCl as reference electrode, Pt wire as auxiliary electrode, 0.1 M sodium phosphate buffer pH 7.4).

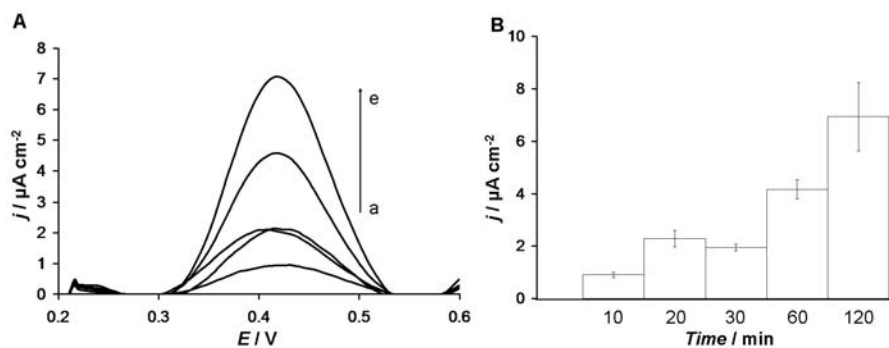

**Fig. S5.** A) Background-subtracted square-wave voltammograms and B) plot of the steady-state current density as a function of reaction time (a to e: 10, 20, 30, 60 and 120 min) for Tau-modified gold electrode in the presence of protein kinase ( $0.5 \mu\text{g mL}^{-1}$ ) and Fc-ATP ( $200 \mu\text{M}$ ). Ag/AgCl as reference electrode, Pt wire as auxiliary electrode, 0.1 M sodium phosphate buffer pH 7.4.

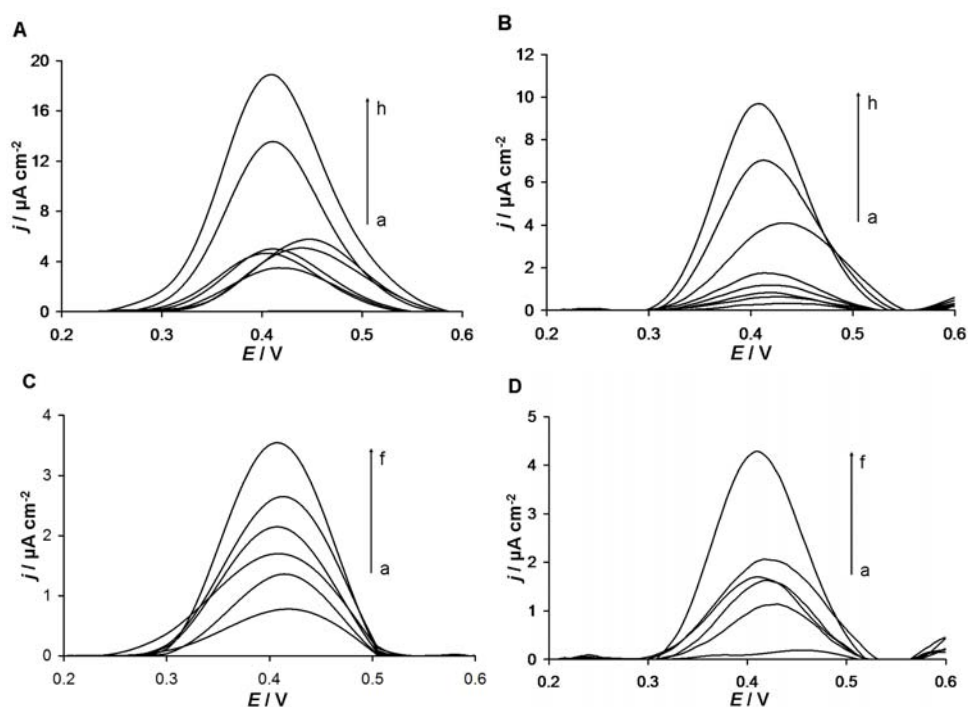

**Fig. S6.** Square-wave voltammograms of Tau-modified gold electrodes after Fc-phosphorylation reactions in the presence of A) Fc-ATP ( $200 \mu\text{M}$ ) and variable PKA concentrations; PKA concentrations from a to h are 0, 0.01, 0.08, 0.3, 0.8 and  $1 \mu\text{g mL}^{-1}$ . B) PKA ( $0.5 \mu\text{g mL}^{-1}$ ) and variable Fc-ATP concentrations; Fc-ATP concentrations from a to h are 0, 3, 5, 50, 75, 166, 250 and  $416 \mu\text{M}$ . C) Fc-ATP ( $200 \mu\text{M}$ ) and variable Src concentrations; Src concentrations from a to f are 0.01, 0.05, 0.1, 0.2, 0.5 and  $1 \mu\text{g mL}^{-1}$ . D) Src ( $0.5 \mu\text{g mL}^{-1}$ ) and variable Fc-ATP concentrations. Fc-ATP concentrations from a to f are 0, 5, 25, 43, 83 and  $250 \mu\text{M}$ .

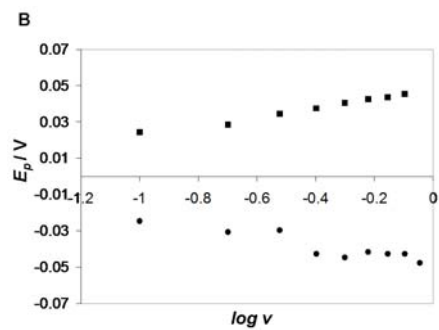

**Fig. S7.** Representative Laviron plot ( $\log v$  versus  $E_p$ ) of the immobilized Tau film on Au surface following the Fc-phosphorylation with Fc-ATP and Src.
